# Supplementary figures and images for: FGF21 does not require adipocyte AMP-activated protein kinase (AMPK) or the phosphorylation of acetyl-CoA carboxylase (ACC) to mediate improvements in whole-body glucose homeostasis
Source: PubMed Central journal article supplement — Mol Metab. 2017 Apr 5;6(6):471–81. doi: 10.1016/j.molmet.2017.04.001 (PMC5444097; doi:10.1016/j.molmet.2017.04.001), 2017-04-05

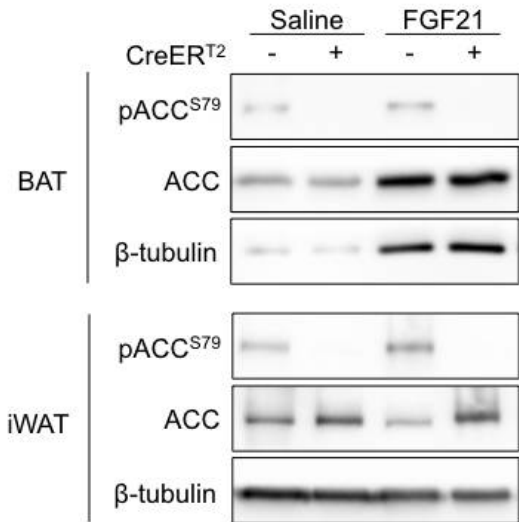

**Supplemental Figure 1**

Supplement: mmc1.pdf [file mmc1.pdf]
